# Supplementary material for: Modulation of the Tumor Microenvironment by CXCR4 Antagonist-Armed Viral Oncotherapy Enhances the Antitumor Efficacy of Dendritic Cell Vaccines against Neuroblastoma in Syngeneic Mice
Source: PubMed Central journal article supplement (PMC6165252; doi:10.3390/v10090455), 2018-08-26
Supplement: viruses-10-00455-s001.pdf [file viruses-10-00455-s001.pdf]

Supplementary Materials.

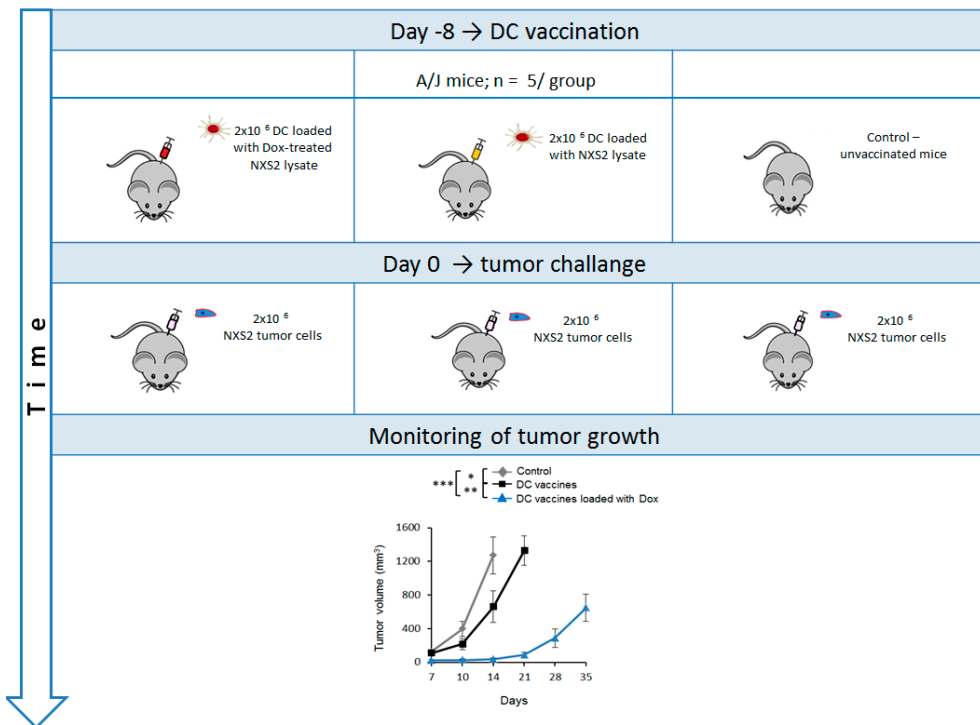

**Figure S1.** Testing the immunogenicity of DC vaccines – prophylactic setting. The tumor lysates-pulsed murine DCs ( $2 \times 10^6$  DCs/dose) or untreated DCs ( $2 \times 10^6$  DCs/dose) were injected intradermally into A/J mice ( $n = 5$ /group). Next, each mouse was injected subcutaneously (SC) in the lateral flank with  $2 \times 10^6$  NXS2 cells on day 8 after vaccination (day 0). Unvaccinated mice ( $n = 5$ ) served as a control group. Tumor growth was monitored by measuring SC tumors once to thrice a week with a microcaliper until control mice were euthanized due to extensive tumor burden. \* $p < 0.05$ , \*\* $p < 0.01$ , \*\*\* $p < 0.001$ .

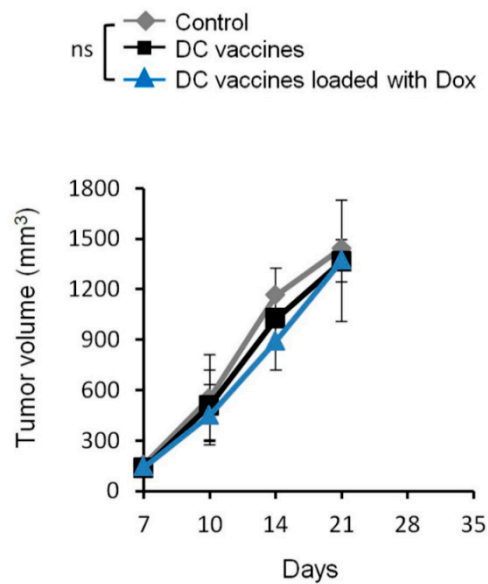

**Figure S2.** Effect of DC vaccines on tumor growth of NXS2 tumor-challenged SCID mice. BM-derived DCs were loaded with Dox-treated NXS2 tumor cell lysates or untreated NXS2 tumor cells and injected intradermally ( $2 \times 10^6$  DCs/dose) into SCID mice. Mice were challenged SC in the lateral flank

with  $2 \times 10^6$  NXS2 cells on day 8 after vaccination. Control mice were unvaccinated. Tumor growth was monitored by measuring SC tumor growth with a microcaliper until control mice were euthanized due to extensive tumor burden. Results are presented as mean  $\pm$  SD of three independent experiments.

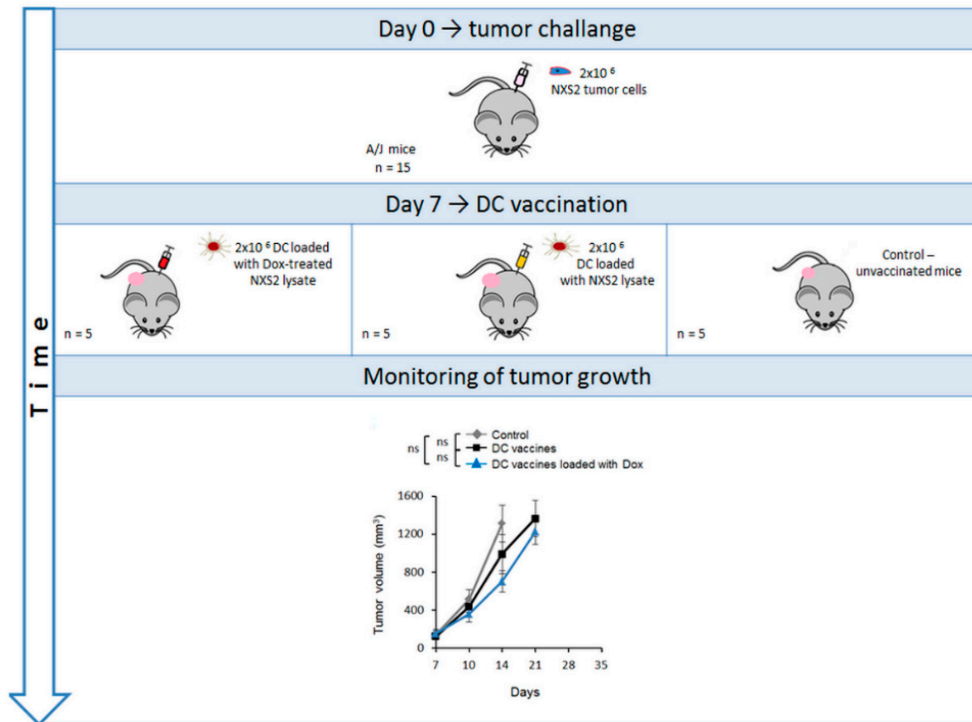

**Figure S3.** Testing the immunogenicity of DC vaccines—therapeutic setting. A/J mice ( $n= 15$ ) were first injected SC with  $2 \times 10^6$  NXS2 cells in the lateral flank and 7 days later DC vaccines (DCs loaded with NXS2 lysates prepared from untreated or Dox-treated tumor cells) were injected intradermally into the opposite site ( $n = 5$ /group). Unvaccinated A/J mice served as controls ( $n = 5$ ). Tumor growth was monitored by measuring SC tumors once to thrice a week with a microcaliper until control mice were euthanized due to extensive tumor burden.

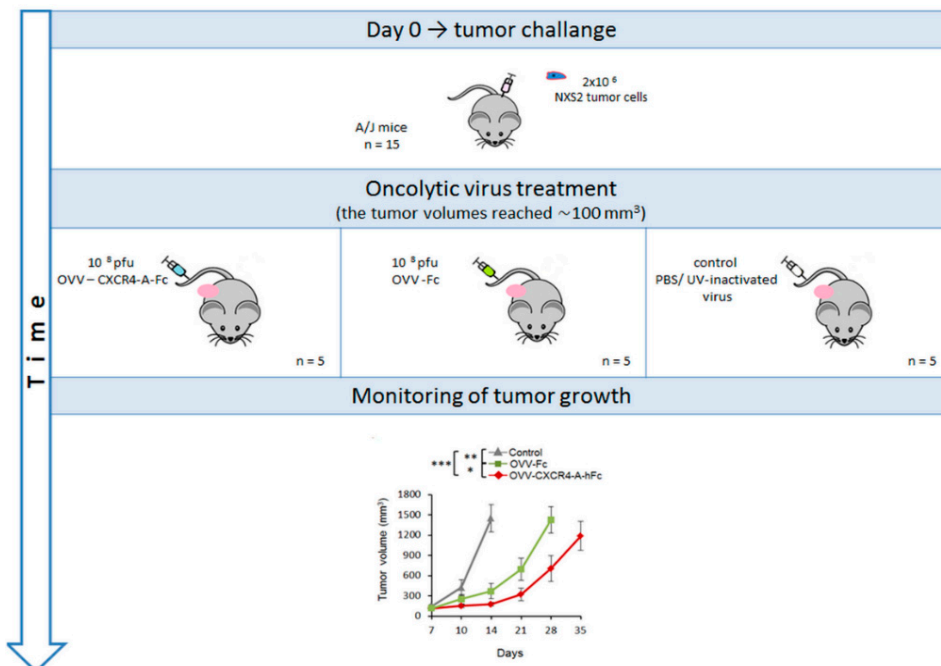

**Figure S2.** Treatment of established tumors with oncolytic viruses. A/J mice ( $n = 15$ ) were injected SC with  $2 \times 10^6$  NXS2 cells and treated with OVV-CXCR4-A-Fc or OVV-Fc ( $10^8$  PFU delivered intravenously, IV;  $n = 5$  mice per group) once the tumor volumes reached  $\sim 100 \text{ mm}^3$  (on day 7). Control mice ( $n=5$ ) received PBS or UV-inactivated virus. Tumor progression was monitored by measuring SC tumor growth with a microcaliper until control mice were euthanized due to extensive tumor burden.  $*p < 0.05$ ,  $**p < 0.01$ ,  $***p < 0.001$ .

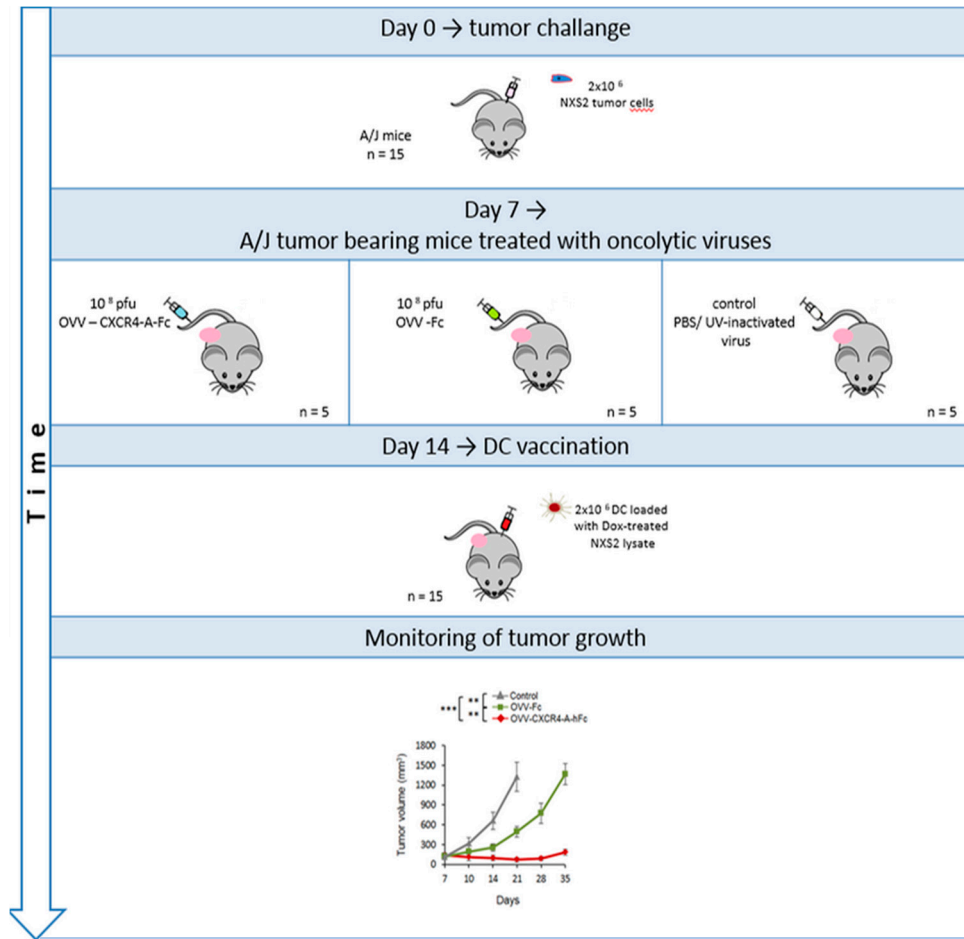

**Figure S3.** The enhancement of oncolytic viruses treatment of established tumors with DC vaccines. NXS2 tumor bearing mice were treated with OVV-CXCR4-A-Fc or OVV-Fc ( $10^8$  PFU delivered IV) once the tumor volumes reached  $\sim 100 \text{ mm}^3$  (on day 7). Control group was injected with PBS or UV inactivated virus ( $n = 5$  mice/group). The DC vaccines were delivered after the cessation of viral replication (on day 14). Tumor growth was monitored by measuring SC tumors once to thrice a week with a microcaliper until control mice were euthanized due to extensive tumor burden.  $**p < 0.01$ ,  $***p < 0.001$ .
